# Supplementary material
Source: PubMed Central journal article supplement (PMC5971614)
Supplement: AAC.00438-18_zac006187210s1.pdf [file AAC.00438-18_zac006187210s1.pdf]

Table S1: Main characteristics of the studies Included in the meta-analysis

| Study          | Participants                                                             | Macrolide users(No)/control (No) | Age (mean) | Study type | Outcomes                                                                                                                                 | Baseline disease                            | Macrolide type                 | Dosage regimen                                           | Duration of follow up | Control                                            |
|----------------|--------------------------------------------------------------------------|----------------------------------|------------|------------|------------------------------------------------------------------------------------------------------------------------------------------|---------------------------------------------|--------------------------------|----------------------------------------------------------|-----------------------|----------------------------------------------------|
| Berg 2005(1)   | Outpatient clinic from Amiphia hospital - Amsterdam Netherland 1999-2001 | 208/216                          | 64         | RCT        | Death, unstable angina, non-fatal MI, revascularization, stroke                                                                          | documented coronary artery disease          | clarithromycin                 | 500mg/day (mean duration 15.7 days.                      | 2 years               | placebo                                            |
| Berni 2017 (2) | UK Clinical Practice Research Database (CPRD) 1998-2012                  | 165,267/865,294                  | 56         | cohort     | First ever cardiovascular event (non-fatal MI, stroke, angina, transient ischemic attack), all-cause mortality and first ever arrhythmia | Lower and upper respiratory tract infection | Clarithromycin, erythromycin   | NA                                                       | 14, 37 days           | Amoxicillin, Co-amoxiclav, penicillin V, cefalexin |
| Cercek 2003(3) | Seven centers in Europe, Israel and USA                                  | 716/723                          | 65         | RCT        | Death, non-fatal MI, CABG/PTCA                                                                                                           | unstable angina, or MI                      | Azithromycin                   | 500mg for the first day followed by 250mg/day for 4 days | 6 months              | placebo                                            |
| Chou 2015(4)   | Taiwan national health insurance system;                                 | 459,988/1,102,358                | 45         | cohort     | Arrhythmia, cardiac mortality                                                                                                            | NA                                          | Azithromycin<br>Clarithromycin | NA                                                       | Current use           | Amoxicillin - clavulanate                          |

| Study              | Participants                                                               | Macrolide users(No)/control (No) | Age (mean) | Study type | Outcomes                                                                                                                                      | Baseline disease                         | Macrolide type | Dosage regimen                               | Duration of follow up      | Control                                                           |
|--------------------|----------------------------------------------------------------------------|----------------------------------|------------|------------|-----------------------------------------------------------------------------------------------------------------------------------------------|------------------------------------------|----------------|----------------------------------------------|----------------------------|-------------------------------------------------------------------|
| Goldstein 2015(5)  | Medical wards in Israeli hospital;                                         | 90/32                            | 70         | cohort     | Legthening of QTc                                                                                                                             | CAP                                      | Azithromycin   | NA                                           | Current use                | Ampicillin-clavulanate, chloramphenicol, doxycycline, ceftriaxone |
| Grayston 2005(6)   | 28 centers in the USA 1999-2000                                            | 2004/2008                        | 65         | RCT        | Cardiovascular mortality, MI, unstable angina, stroke                                                                                         | Documented stable coronary heart disease | Azithromycin   | One year course of weekly 600mg azithromycin | 3.9 years                  | placebo                                                           |
| Gurfinkel 1999 (7) | Patients with unstable angina                                              | 102/100                          | 61         | RCT        | Severe recurrent ischemia, MI and death                                                                                                       | unstable angina                          | Roxithromycin  | 150mg twice daily for 30 days                | 30 days, 90 days, 6 months | placebo                                                           |
| Gupta 1997 (8)     | Outpatient clinic at George's hospital between February and September 1995 | 40/40                            | 60         | RCT        | Cardiovascular events defined as non-fatal MI, unstable angina, coronary angioplasty, coronary artery bypass surgery and cardiovascular death | Males, Post MI                           | Azithromycin   | 500mg/day for 3 days or for 6 days           | 18 months                  | placebo                                                           |

| Study                | Participants                                            | Macrolide users(No)/control (No) | Age (mean) | Study type | Outcomes                                                                                                                                          | Baseline disease                                                                     | Macrolide type | Dosage regimen                                         | Duration of follow up | Control                                                                                                      |
|----------------------|---------------------------------------------------------|----------------------------------|------------|------------|---------------------------------------------------------------------------------------------------------------------------------------------------|--------------------------------------------------------------------------------------|----------------|--------------------------------------------------------|-----------------------|--------------------------------------------------------------------------------------------------------------|
| Jespersen 2009 (9)   | Copenhagen, Denmark 1993–1999 (Jespersen et al., 2006)) | 2172/2200                        | 65         | RCT        | All-cause mortality , MI, unstable angina Atrial fibrillation, Cardiovascular mortality, stroke, atrial fibrillation, peripheral vascular disease | History of MI, angina pectoris, percutaneous angioplasty or coronary bypass surgery. | Clarithromycin | 500mg/day for 14 days                                  | 30days                | placebo                                                                                                      |
| Leowattana 2001 (10) | Thailand 1998-2000                                      | 43/41                            | 61         | RCT        | Cardiovascular mortality , MI, unstable angina and coronary revascularization                                                                     | acute coronary syndrome patients                                                     | Roxithromycin  | 30 days treatment with roxithromycin 150mg twice daily | 90 days               | placebo                                                                                                      |
| Luchsinger 2002 (11) | Healthcare claims database (Virginia) 1991-1997         | 70,801/152,475                   | NS         | cohort     | MI                                                                                                                                                | NA                                                                                   | Not specified  | NA                                                     | NS                    | Non users of macrolides, quinolones, tetracycline, penicillin, cephalosporin, trimethoprim-sulfamethoxazole, |

| Study                | Participants                                            | Macrolide users(No)/control (No) | Age (mean)     | Study type          | Outcomes                                                                                                          | Baseline disease                                              | Macrolide type                                             | Dosage regimen                                        | Duration of follow up            | Control                                                                                          |
|----------------------|---------------------------------------------------------|----------------------------------|----------------|---------------------|-------------------------------------------------------------------------------------------------------------------|---------------------------------------------------------------|------------------------------------------------------------|-------------------------------------------------------|----------------------------------|--------------------------------------------------------------------------------------------------|
| Meier 1999 (12)      | General practices in UK 1992-1997                       | 428/16,026                       | 60-69 (median) | Nested case control | MI                                                                                                                | NA                                                            | Not specified (erythromycin, clarithromycin, azithromycin) | NA                                                    | 3 years preceding the index date | No antibiotics use                                                                               |
| Mortensen 2014 (13)  | Veteran administration health care system 2001-2012     | 31,863/31,863                    | 77             | cohort              | Any cardiac event, arrhythmia, heart failure, MI                                                                  | pneumonia                                                     | azithromycin                                               | NA                                                    | 90 days                          | Antibiotic therapy concordant with the 2007 IDSA/ATS guidelines for community acquired pneumonia |
| Mosholder 2017(14)   | UK clinical practice research datalink (CPRD) 2001-2013 | 730747/267729                    | NA             | cohort              | MI, stroke, death                                                                                                 | Various indications (mainly respiratory indications)          | Clarithromycin<br>Erythromycin                             | NA                                                    | 2.4-3.9 years                    | Doxycycline                                                                                      |
| Muhlestein 2000 (15) | Utah, USA                                               | 150/152                          | 63.5           | RCT                 | Cardiovascular mortality, resuscitated cardiac arrest, MI, stroke, unstable angina and coronary revascularization | Coronary artery disease patients seropositive to C pneumoniae | Azithromycin                                               | 500mg/day for 3 days and then 500mg/week for 3 months | 2 years                          | placebo                                                                                          |
| Neumann 2002 (16)    | Germany                                                 | 506/504                          | 64             | RCT                 | Restenosis                                                                                                        | Post successful coronary stenting                             | Roxithromycin                                              | 300mg/day for 28 days                                 | 1 year                           | placebo                                                                                          |

| Study              | Participants                                                                      | Macrolide users(No)/control (No) | Age (mean) | Study type                           | Outcomes                                     | Baseline disease                                            | Macrolide type                             | Dosage regimen                                                      | Duration of follow up | Control     |
|--------------------|-----------------------------------------------------------------------------------|----------------------------------|------------|--------------------------------------|----------------------------------------------|-------------------------------------------------------------|--------------------------------------------|---------------------------------------------------------------------|-----------------------|-------------|
| O'Connor 2003 (17) | 1 clinical practices in North America, Europe, Argentina and India from 1997-2001 | 3866/3856                        | 62         | RCT                                  | Death, MI, revascularization, angina         | previous MI and chlamydia pneumoniae titer of 1 :16 or more | Azithromycin                               | 600mg/day for 3 days during week 1, then 600mg/week during week2-12 | 14 months             | placebo     |
| Quinn 2017(18)     | Ontario residents prescribed digoxin 1994-2012                                    | 2007/6013                        | 86.5       | Population-based nested case control | Sudden death                                 | Digoxin users                                               | Erythromycin, clarithromycin, azithromycin | NA                                                                  | 14 days               | cefuroxime  |
| Rao 2014(19)       | US veterans                                                                       | 594,792/979,380                  | 57         | cohort                               | Serious cardiac arrhythmias, all cause death | NA                                                          | Azithromycin                               | 5 days                                                              | 10 days               | amoxicillin |
| Ray 2004 (20)      | Tennessee Medicaid, 1988-1993                                                     | 5305/1,126,013 (person years)    | 43         | cohort                               | Cardiac mortality                            | NA                                                          | Erythromycin                               | NA                                                                  | Current use           | Amoxicillin |
| Ray 2012 (21)      | Tennessee Medicaid, 1992-2006                                                     | 347,795/1,348,672                | 48         | cohort                               | Cardiac mortality, all-cause mortality       | NS                                                          | Azithromycin                               | 5 days regimen                                                      | Current use           | Amoxicillin |

| Study              | Participants                                                                  | Macrolide users(No)/control (No) | Age (mean)                             | Study type         | Outcomes                                                               | Baseline disease                                     | Macrolide type                                                              | Dosage regimen               | Duration of follow up                                       | Control                       |
|--------------------|-------------------------------------------------------------------------------|----------------------------------|----------------------------------------|--------------------|------------------------------------------------------------------------|------------------------------------------------------|-----------------------------------------------------------------------------|------------------------------|-------------------------------------------------------------|-------------------------------|
| Root 2016 (22)     | Clinical Practice Research Datalink, a UK primary care database               | 26,029/2523                      | 53                                     | cohort             | Arrhythmia, cardiac mortality, MI                                      | Helicobacter pylori                                  | Clarithromycin (as a combination as part of Helicobacter pylori treatment ) | 1-2 weeks treatment duration | 90 days                                                     | Helicobacter pylori treatment |
| Schembri 2013 (23) | EXODUS dataset (UK) 2009-2011; and Edinburgh pneumonia cohort (UK) 2005-2009; | 281/1062 (COPD) 980/651 (CAP)    | COPD cohort 72; CAP cohort 66 (median) | Cohort (2 cohorts) | Arrhythmia, cardiac mortality, cardiac arrest, MI, at least 1 CV event | COPD CAP                                             | Clarithromycin                                                              | NA                           | 1 year                                                      | NS                            |
| Sinisalo 2002 (24) | 9 hospitals in different parts of Finland 1998-2000                           | 74/74                            | 63.5                                   | RCT                | MI, unstable angina, death, stroke                                     | Unstable angina or non Q wave myocardial infarction. | Clarithromycin                                                              | 500mg/day for 85 days        | During treatment period, and average follow up of 555 days. | placebo                       |

| Study               | Participants                                           | Macrolide users(No)/control (No) | Age (mean) | Study type   | Outcomes                                                | Baseline disease        | Macrolide type                                  | Dosage regimen                                                          | Duration of follow up | Control                                                                 |
|---------------------|--------------------------------------------------------|----------------------------------|------------|--------------|---------------------------------------------------------|-------------------------|-------------------------------------------------|-------------------------------------------------------------------------|-----------------------|-------------------------------------------------------------------------|
| Stone 2002(25)      | Coronary care units of 4 hospitals in London           | 111/214                          | 66         | RCT          | Cardiovascular mortality, Readmission with MI or angina | Acute coronary syndrome | Azithromycin                                    | 500mg/day for one week in combination with metronidazole and omeprazole | 1 year                | Amoxicillin in combination with metronidazole and omeprazole or placebo |
| Straus 2005 (26)    | 150 general practitioners in the Netherlands 1995-2003 | 81/6197                          | 70         | case control | Sudden cardiac death                                    | NA                      | Erythromycin, Clatithromycin                    | NA                                                                      |                       | Non use                                                                 |
| Svanstrom 2013 (27) | Danish civil registration system 1997-2010             | 1,102,050/ 7,364,292             | 40         | cohort       | Cardiovascular mortality                                | NA                      | Azithromycin                                    | NA                                                                      | 10,35 days            | Penicillin V                                                            |
| Svanstrom 2014 (28) | Danish civil registration system 1997-2010             | 749,285/ 4,355,309               | 56         | cohort       | Cardiovascular mortality                                | NA                      | Clarithromycin Roxithromycin                    | Seven day treatment                                                     | 7, 37 days            | Penicillin V                                                            |
| Trac 2016(29)       | The Ontario Health Insurance plan 2002-2013            | 503,612/ 503,612                 | 74         | cohort       | Arrhythmias, all-cause mortality                        | NA                      | NS (Azithromycin, clarithromycin, erythromycin) | NA                                                                      | 30days                | Non-macrolide (amoxicillin, cefuroxime, levofloxacin)                   |

| Study             | Participants                                                                                 | Macrolide users(No)/control (No) | Age (mean) | Study type            | Outcomes                                           | Baseline disease                                      | Macrolide type | Dosage regimen       | Duration of follow up                              | Control     |
|-------------------|----------------------------------------------------------------------------------------------|----------------------------------|------------|-----------------------|----------------------------------------------------|-------------------------------------------------------|----------------|----------------------|----------------------------------------------------|-------------|
| Trifiro 2017 (30) | A network of 7 population based health care databases in 5 European countries 1997-2010)     | 118/535                          | 63.5       | A nested case control | Ventricular arrhythmia                             | NA                                                    | Azithromycin   | NA                   | Current exposure 7 days past exposure 7-89 days    | Amoxicillin |
| Vainas 2005 (31)  | Surgical clinics of a university hospital and two affiliated teaching hospitals, Netherlands | 257/252                          | 65         | RCT                   | All-cause mortality , cerebral and coronary events | Patients with symptomatic peripheral arterial disease | Azithromycin   | 500mg/day for 3 days | 2 years                                            | placebo     |
| Wong 2016 (32)    | Hong Kong population based, 2005-2009                                                        | 109,988/ 217,793                 | 60         | cohort                | Arrhythmia, cardiac mortality, MI, other CV events | NA                                                    | Clarithromycin | NA                   | 14 days                                            | Amoxicillin |
| Zambon 2009 (33)  | All residents of Italian province 1998-2003                                                  | NA/NA                            | 70         | case control          | Arrhythmia/cardiac arrest                          | NA                                                    | Not specified  | NA                   | Recent/ Immediately prior to the date of the event | Non users   |

NA ,not applicable; RCT, randomized controlled trial; MI, myocardial infarction; UK, United kingdom; USA, United States; CABG, coronary artery bypass graft; PTCA, percutaneous transluminal coronary angioplasty; COPD, chronic obstructive pulmonary disease; CAP, community-acquired pneumonia



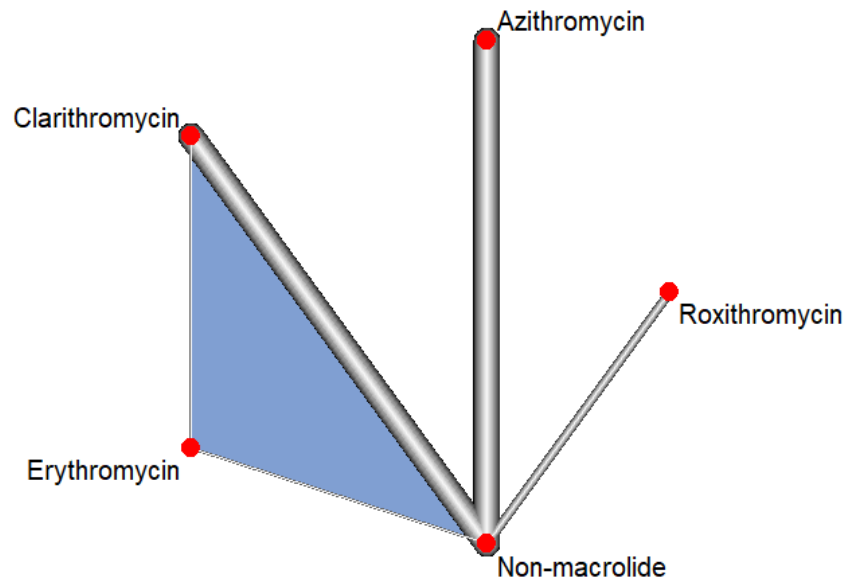

Figure S1: Network plot. **The nodes in the graph correspond to the treatments, and the edges (lines) display the direct comparisons between the different treatments reported in the studies. The thickness of each edge represents the number of studies directly comparing the two treatments.**

Table S2: The quality of observational Studies based on NOS, New Castle Scoring System (range 1-9 stars).

| Study                        | Study type           | NOS     |
|------------------------------|----------------------|---------|
| Berni 2017                   | Retrospective cohort | 4+2+3=9 |
| Chou 2015                    | cohort               | 4+2+3=9 |
| Goldstein 2015               | cohort               | 4+0+3=7 |
| Luchsinger 2002<br>(only OR) | cohort               | 4+1+3=8 |
| Meier 1999                   | case control         | 4+1+2=7 |
| Mortensen 2014               | retrospective cohort | 3+2+3=8 |
| Mosholder 2017               | retrospective cohort | 4+2+3=9 |
| Quinn 2017                   | nested case control  | 4+1+3=8 |
| Ray 2004                     | cohort               | 4+2+3=9 |
| Ray 2012                     | cohort               | 4+2+2=8 |
| Root 2016                    | cohort               | 4+2+3=9 |
| Schembri 2013                | Cohort (2 cohorts)   | 4+2+3=9 |
| Straus 2005                  | case control         | 4+1+3=8 |
| Svanstrom 2013               | cohort               | 4+2+3=9 |
| Svanstrom 2014               | cohort               | 4+1+3=8 |
| Trac 2016                    | cohort               | 3+1+3=7 |
| Trifiro 2017                 | nested case control  | 3+1+2=6 |
| Wong 2016                    | cohort               | 4+2+3=9 |
| Zambon 2009                  | case control         | 4+2+3=7 |

Table S3: Risk of bias for randomized control trials based on Cochrane tool for assessing risk of bias.

|                 | Random sequence generation (selection bias) | Allocation concealment (selection bias) | Blinding of participants and personnel (performance bias) | Blinding of outcome assessment (detection bias) | Incomplete outcome data (attrition bias) | Selective reporting (reporting bias) | Other bias |
|-----------------|---------------------------------------------|-----------------------------------------|-----------------------------------------------------------|-------------------------------------------------|------------------------------------------|--------------------------------------|------------|
| Berg 2005       | +                                           | ?                                       | +                                                         | +                                               | +                                        | +                                    | ?          |
| Cercek 2003     | ?                                           | +                                       | +                                                         | +                                               | +                                        | +                                    | ?          |
| Grayston 2005   | ?                                           | ?                                       | +                                                         | +                                               | +                                        | +                                    | ?          |
| Gupta 1997      | ?                                           | ?                                       | ?                                                         | ?                                               | ?                                        | +                                    | ?          |
| Gurfinkel 1999  | +                                           | ?                                       | +                                                         | ?                                               | +                                        | +                                    | ?          |
| Jespersen 2009  | +                                           | +                                       | +                                                         | +                                               | +                                        | +                                    | ?          |
| Leowattana 2001 | +                                           | ?                                       | +                                                         | ?                                               | ?                                        | ?                                    | ?          |
| Muhlestein 2000 | +                                           | +                                       | +                                                         | +                                               | +                                        | +                                    | ?          |
| Neumann 2001    | +                                           | +                                       | ?                                                         | ?                                               | ?                                        | +                                    | ?          |
| O'Connor 2003   | +                                           | +                                       | +                                                         | +                                               | +                                        | +                                    | ?          |
| Sinisalo 2002   | +                                           | +                                       | +                                                         | +                                               | +                                        | +                                    | ?          |
| Stone 2002      | ?                                           | ?                                       | +                                                         | +                                               | +                                        | +                                    | ?          |
| Vainas 2005     | +                                           | ?                                       | +                                                         | +                                               | +                                        | +                                    | ?          |

Table S4: Main characteristics of the studies Included in the arrhythmia analysis

| First author | year | Study type                     | Macrolide users(No)/control (No) | Macrolide type                                                      | Control                                                                         |
|--------------|------|--------------------------------|----------------------------------|---------------------------------------------------------------------|---------------------------------------------------------------------------------|
| Berni(2)     | 2017 | cohort                         | 165,267/<br>865,294              | Clarithromycin<br>, Erythromycin                                    | Amoxicillin, Co-<br>amoxiclav,<br>penicillin V,<br>cefalexin                    |
| Chou(4)      | 2015 | cohort                         | 459,988/<br>1,102,358            | Azithromycin<br>Clarithromycin                                      | Amoxicillin -<br>clavulanate                                                    |
| Goldstein(5) | 2015 | cohort                         | 90/32                            | Azithromycin                                                        | Ampicillin-<br>clavulanate,<br>chloramphenicol<br>, doxycycline,<br>ceftriaxone |
| Jespersen(9) | 2009 | RCT                            | 2172/2200                        | Clarithromycin                                                      | placebo                                                                         |
| Rao(19)      | 2014 | cohort                         | 594,792/<br>979,380              | Azithromycin                                                        | amoxicillin                                                                     |
| Trac(34)     | 2016 | cohort                         | 503,612/<br>503,612              | Not specified<br>(Azithromycin,<br>clarithromycin,<br>erythromycin) | Non-macrolide<br>(amoxicillin,<br>cefuroxime,<br>levofloxacin)                  |
| Trifiro(30)  | 2017 | A<br>nested<br>case<br>control | 118/535                          | Azithromycin                                                        | amoxicillin                                                                     |
| Wong(32)     | 2016 | cohort                         | 109,988/<br>217,793              | Clarithromycin                                                      | amoxicillin                                                                     |
| Zambon(33)   | 2009 | case<br>control                | NA/NA                            | Not specified                                                       | Non users                                                                       |

RCT, randomized controlled trial, NA, not applicable

Table S5: Main characteristics of the studies Included in the short-term cardiovascular mortality analysis

| First author  | year | Study type                           | Macrolide users(No)/control (No)     | Macrolide type                                  | Control                         |
|---------------|------|--------------------------------------|--------------------------------------|-------------------------------------------------|---------------------------------|
| Chou(21)      | 2015 | cohort                               | 459,988/<br>1,102,358                | Azithromycin<br>Clarithromycin                  | Amoxicillin<br>-<br>clavulanate |
| Jespersen(6)  | 2009 | RCT                                  | 2172/2200                            | Clarithromycin                                  | placebo                         |
| Quinn(27)     | 2017 | Population-based nested case control | 2007/6013                            | Erythromycin,<br>Clarithromycin<br>Azithromycin | Cefuroxime                      |
| Ray(28)       | 2004 | cohort                               | 5305/<br>1,126,013<br>(person years) | Erythromycin                                    | Amoxicillin                     |
| Ray(29)       | 2012 | cohort                               | 347,795/<br>1,348,672                | Azithromycin                                    | Amoxicillin                     |
| Straus(30)    | 2005 | case control                         | 81/6197                              | Erythromycin,<br>Clarithromycin                 | Non users                       |
| Svanstrom(31) | 2013 | cohort                               | 1,102,050/<br>7,364,292              | Azithromycin                                    | Penicillin V                    |
| Svanstrom(32) | 2014 | cohort                               | 749,285/<br>4,355,309                | Clarithromycin,<br>Roxithromycin                | Penicillin V                    |
| Wong(15)      | 2016 | cohort                               | 109,988/<br>217,793                  | Clarithromycin                                  | Amoxicillin                     |

RCT, randomized controlled trial

Table S6: Main characteristics of the studies Included in the myocardial infarction analysis

| First author   | year | Study type   | Macrolide users(No)/control (No) | Macrolide type                                                              | Control                                                                                                     |
|----------------|------|--------------|----------------------------------|-----------------------------------------------------------------------------|-------------------------------------------------------------------------------------------------------------|
| Berg(1)        | 2005 | RCT          | 208/216                          | Clarithromycin                                                              | Placebo                                                                                                     |
| Cercek (2)     | 2003 | RCT          | 716/723                          | Azithromycin                                                                | Placebo                                                                                                     |
| Grayston(3)    | 2005 | RCT          | 2004/2008                        | Azithromycin                                                                | Placebo                                                                                                     |
| Gurfinkel(4)   | 1999 | RCT          | 102/100                          | Roxithromycin                                                               | Placebo                                                                                                     |
| Gupta(5)       | 1997 | RCT          | 40/40                            | Azithromycin                                                                | Placebo                                                                                                     |
| Jespersen(6)   | 2009 | RCT          | 2172/2200                        | Clarithromycin                                                              | Placebo                                                                                                     |
| Leowattana(7)  | 2001 | RCT          | 43/41                            | Roxithromycin                                                               | Placebo                                                                                                     |
| Luchsinger(8)  | 2002 | cohort       | 70,801/<br>152,475               | Not specified                                                               | Non users of macrolides, quinolones, tetracycline, penicillin, cephalosporin, trimethoprim-sulfamethoxazole |
| Meier(9)       | 1999 | Case control | 428/<br>16,026                   | Not specified                                                               | No antibiotics use                                                                                          |
| Mortensen(10)  | 2014 | cohort       | 31,863/<br>31,863                | Azithromycin                                                                | Antibiotic therapy concordant with the 2007 IDSA/ATS guidelines for community acquired pneumonia            |
| Mosholder(11)  | 2017 | cohort       | 730,747/267,729                  | Clarithromycin<br>Erythromycin                                              | doxycycline                                                                                                 |
| Muhlestein(12) | 2000 | RCT          | 150/152                          | Azithromycin                                                                | Placebo                                                                                                     |
| Neumann(13)    | 2002 | RCT          | 506/504                          | Roxithromycin                                                               | Placebo                                                                                                     |
| O'Connor(14)   | 2003 | RCT          | 3866/3856                        | Azithromycin                                                                | Placebo                                                                                                     |
| Root(15)       | 2016 | cohort       | 26,029/<br>2523                  | Clarithromycin (as a combination as part of Helicobacter pylori treatment ) | Helicobacter pylori treatment                                                                               |

|              |      |        |                                  |                |                                                                         |
|--------------|------|--------|----------------------------------|----------------|-------------------------------------------------------------------------|
| Schembri(16) | 2013 | cohort | 281/1062 (COPD)<br>980/651 (CAP) | Clarithromycin | Not specified                                                           |
| Sinisalo(17) | 2002 | RCT    | 74/74                            | Clarithromycin | Placebo                                                                 |
| Stone(18)    | 2002 | RCT    | 111/214                          | Azithromycin   | Amoxicillin in combination with metronidazole and omeprazole or placebo |
| Vainas(19)   | 2005 | RCT    | 257/252                          | Azithromycin   | Placebo                                                                 |
| Wong(15)     | 2016 | cohort | 109,988/<br>217,793              | Clarithromycin | Amoxicillin                                                             |

RCT, randomized controlled trial

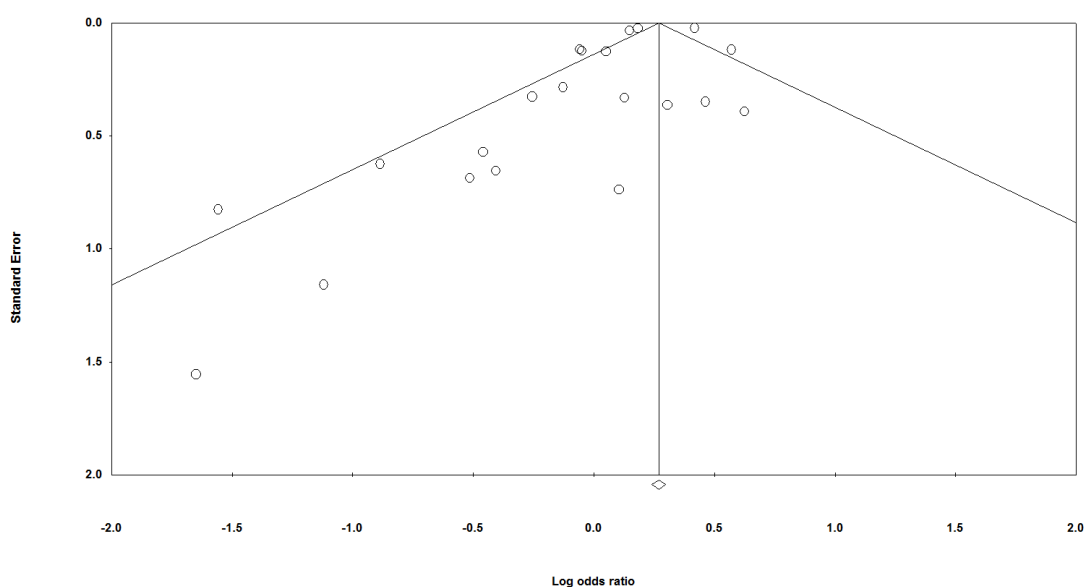

Figure S2: publication bias Funnel plot for MI analysis. **Plot depicts the distribution of the reported log odds ratio in each study in relation to each study's size (as manifest by its standard error), centered around the estimated pooled effect. Visual inspection of this plot suggests asymmetric reporting of smaller studies, as smaller studies were more likely to report benefit, or no risk, with macrolides. However, Egger's regression test did not reach significance (p=0.06).**

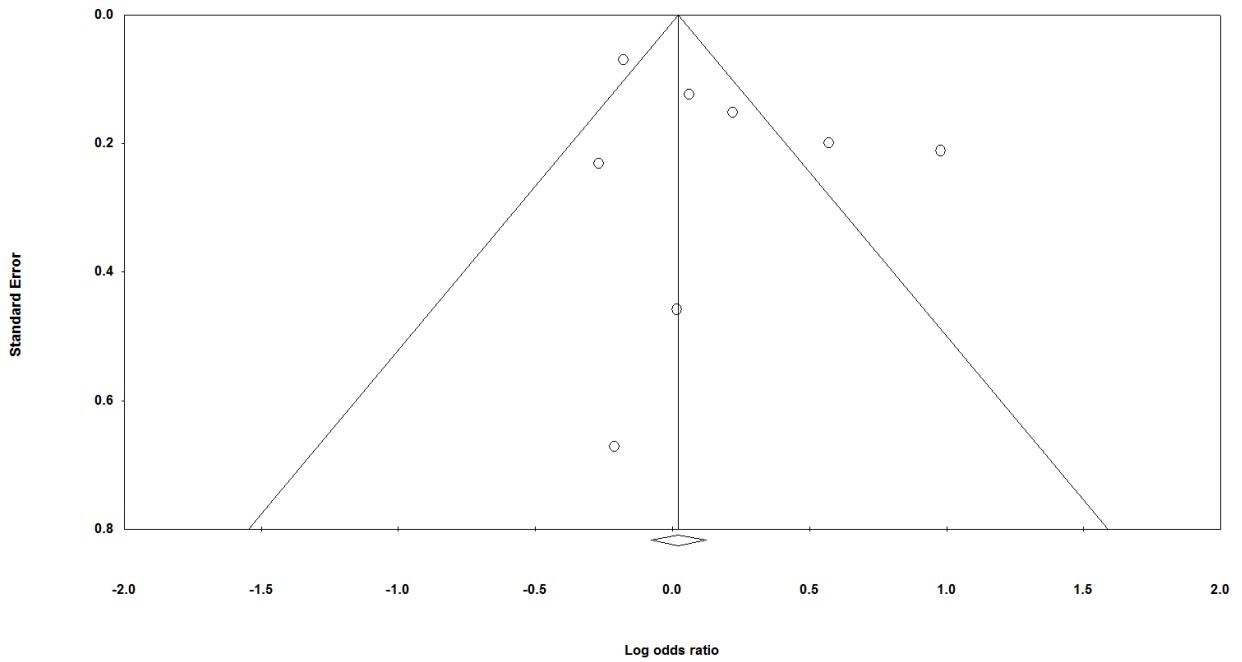

Figure S3: publication bias Funnel plot for arrhythmia analysis. **Plot depicts the distribution of the reported log odds ratio in each study in relation to each study's size (as manifest by its standard error), centered around the estimated pooled effect. Visual inspection of this plot and Egger's regression test did not indicate evidence of publication bias (p=0.25).**



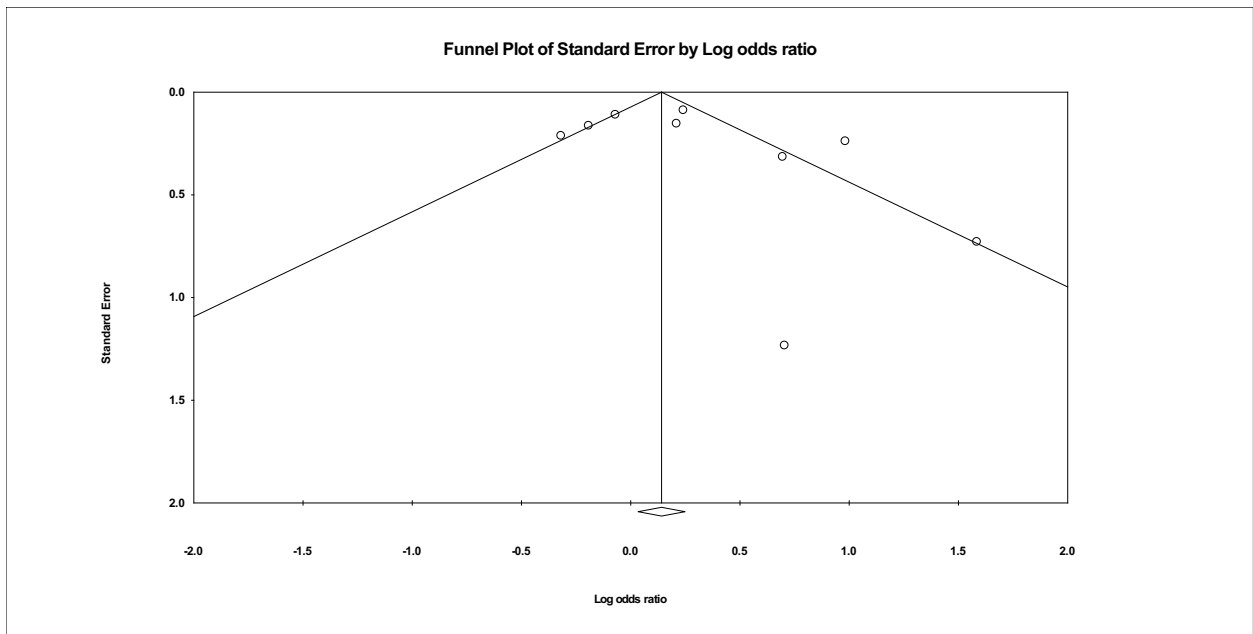

Figure S4: publication bias Funnel plot for cardiovascular mortality analysis. **Plot depicts the distribution of the reported log odds ratio in each study in relation to each study's size (as manifest by its standard error), centered around the estimated pooled effect. Visual inspection of this plot and Egger's regression test did not indicate evidence of publication bias (p=0.33).**

Search details in pubmed:

((("erythromycin"[MeSH Terms] OR "erythromycin"[All Fields]) OR ("azithromycin"[MeSH Terms] OR "azithromycin"[All Fields]) OR ("clarithromycin"[MeSH Terms] OR "clarithromycin"[All Fields]) OR ("roxithromycin"[MeSH Terms] OR "roxithromycin"[All Fields]) OR (macrolide[All Fields] OR macrolide's[All Fields] OR macrolidele[All Fields] OR macrolidelincosamide[All Fields] OR macrolidelor[All Fields] OR macroliden[All Fields] OR macrolideos[All Fields] OR macrolidepharma[All Fields] OR macrolideresistant[All Fields] OR macrolides[All Fields] OR macrolides'[All Fields] OR macrolides,[All Fields] OR macrolidese[All Fields] OR macrolideslincosamides[All Fields])) AND (("cardiovascular system"[MeSH Terms]

OR ("cardiovascular"[All Fields] AND "system"[All Fields]) OR "cardiovascular system"[All Fields] OR "cardiovascular"[All Fields] OR ("heart"[MeSH Terms] OR "heart"[All Fields] OR "cardiac"[All Fields]) OR ("death"[MeSH Terms] OR "death"[All Fields]) OR ("heart arrest"[MeSH Terms] OR ("heart"[All Fields] AND "arrest"[All Fields]) OR "heart arrest"[All Fields] OR ("cardiac"[All Fields] AND "arrest"[All Fields]) OR "cardiac arrest"[All Fields]) OR ("tachycardia, ventricular"[MeSH Terms] OR ("tachycardia"[All Fields] AND "ventricular"[All Fields]) OR "ventricular tachycardia"[All Fields] OR ("ventricular"[All Fields] AND "tachyarrhythmia"[All Fields]) OR "ventricular tachyarrhythmia"[All Fields]) OR ("arrhythmias, cardiac"[MeSH Terms] OR ("arrhythmias"[All Fields] AND "cardiac"[All Fields]) OR "cardiac arrhythmias"[All Fields] OR "arrhythmia"[All Fields]) OR ("torsades de pointes"[MeSH Terms] OR ("torsades"[All Fields] AND "de"[All Fields] AND "pointes"[All Fields]) OR "torsades de pointes"[All Fields]) OR ("mortality"[Subheading] OR "mortality"[All Fields] OR "mortality"[MeSH Terms]) OR (("myocardium"[MeSH Terms] OR "myocardium"[All Fields] OR "myocardial"[All Fields]) AND infraction[All Fields]) OR ("stroke"[MeSH Terms] OR "stroke"[All Fields]) OR (("cardiovascular system"[MeSH Terms] OR ("cardiovascular"[All Fields] AND "system"[All Fields]) OR "cardiovascular system"[All Fields] OR "cardiovascular"[All Fields]) AND events[All Fields])) AND "humans"[MeSH Terms]

## References

1. Berg HF, Maraha B, Scheffer G-J, Quarles-van Ufford M, Vandenbroucke-Grauls CMJE, Peeters MF, Kluytmans JAJW. 2005. Treatment with Clarithromycin Prior to Coronary Artery Bypass Graft Surgery Does Not Prevent Subsequent Cardiac Events. *Clin Infect Dis* 40:358–365.
2. Berni E, Voogd H De, Halcox JP, Butler CC, Bannister CA, Jenkins-jones S, Jones B, Ouwens M, Currie CJ. 2017. Risk of cardiovascular events , arrhythmia and all-cause mortality associated with clarithromycin versus alternative antibiotics prescribed for respiratory tract infections : a retrospective cohort study.
3. Cercek B, Shah PK, Noc M, Zahger D, Zeymer U, Matetzky S, Maurer G, Mahrer P, AZACS Investigators. 2003. Effect of short-term treatment with azithromycin on recurrent ischaemic events in patients with acute coronary syndrome in the Azithromycin in Acute Coronary Syndrome (AZACS) trial: a

- randomised controlled trial. *Lancet* (London, England) 361:809–13.
4. Chou HW, Wang JL, Chang CH, Lai CL, Lai MS, Chan KA. 2015. Risks of cardiac arrhythmia and mortality among patients using new-generation macrolides, fluoroquinolones, and  $\beta$ -lactam/ $\beta$ -lactamase inhibitors: A Taiwanese nationwide study. *Clin Infect Dis* 60:566–577.
  5. Goldstein LH, Gabin A, Fawaz A, Freedberg NA, Schwartz N, Elias M, Saliba W. 2015. Azithromycin is not associated with QT prolongation in hospitalized patients with community-acquired pneumonia 1042–1048.
  6. Grayston JT, Kronmal RA, Jackson LA, Parisi AF, Muhlestein JB, Cohen JD, Rogers WJ, Crouse JR, Borrowdale SL, Schron E, Knirsch C, ACES Investigators. 2005. Azithromycin for the secondary prevention of coronary events. *N Engl J Med* 352:1637–45.
  7. Gurfinkel E, Bozovich G, Beck E, Testa E, Livellara B, Mautner B. 1999. Treatment with the antibiotic roxithromycin in patients with acute non-Q-wave coronary syndromes The final report of the ROXIS study 121–127.
  8. Gupta S, Leatham EW, Carrington D, Mendall MA, Kaski JC, Camm AJ. 1997. Elevated *Chlamydia pneumoniae* Antibodies, Cardiovascular Events, and Azithromycin in Male Survivors of Myocardial Infarction. *Circulation* 96:404–407.
  9. Jespersen CM, Kolmos HJ, Frydendall N, Hilden J, Gluud C, Hansen JF. 2009. Compliance with and short-term adverse events from clarithromycin versus placebo in patients with stable coronary heart disease : the CLARICOR trial 411–415.
  10. Leowattana W, Bhuripanyo K, Singhaviranon L, Akaniroj S, Mahanonda N, Samranthin M, Pokum S. 2001. Roxithromycin in prevention of acute coronary syndrome associated with *Chlamydia pneumoniae* infection: a randomized placebo controlled trial. *J Med Assoc Thai* 84 Suppl 3:S669-75.
  11. Luchsinger A, Pablos-me A, Knirsch C, Rabinowitz D, Shea S. 2002. Relation of Antibiotic Use to Risk of Myocardial Infarction in the General Population 89:18–21.
  12. Meier CR, Derby LE, Jick SS, Vasilakis C, Jick H. 1999. Antibiotics and Risk of Subsequent First-time Acute Myocardial Infarction 281:427–431.
  13. Mortensen EM, Halm EA, Pugh MJ, Copeland LA, Metersky M, Fine MJ, Johnson CS, Alvarez CA, Frei CR, Good C, Restrepo MI, Downs JR, Anzueto

- A. 2014. Association of azithromycin with mortality and cardiovascular events among older patients hospitalized with pneumonia. *Jama* 311:2199–2208.
14. Mosholder AD, Lee J-Y, Zhou EH, Kang EM, Ghosh M, Izem R, Major JM, Graham DJ. 2017. Long-term risk of acute myocardial infarction, stroke and death with outpatient use of clarithromycin: a retrospective cohort study. *Am J Epidemiol*.
  15. Muhlestein JB, Anderson JL, Carlquist JF, Salunkhe K, Horne BD, Pearson RR, Bunch TJ, Allen A, Trehan S, Nielson C. 2000. Randomized Secondary Prevention Trial of Azithromycin in Primary Clinical Results of the ACADEMIC Study.
  16. Neumann F, Kastrati A, Miethke T, Pogatsa-Murray G, Mehilli J, Valina C, Jogethaei N, da Costa CP, Wagner H, Schomig A. 2001. Treatment of *Chlamydia pneumoniae* infection with roxithromycin and effect on neointima proliferation after coronary stent placement (ISAR- 3): a randomised, double-blind, placebo-controlled trial. *Lancet* 357:2085–9.
  17. O'Connor CM, Dunne MW, Pfeffer MA, Muhlestein JB, Yao L, Gupta S, Benner RJ, Fisher MR, Cook TD. 2003. Azithromycin for the secondary prevention of coronary heart disease events: the WIZARD study: a randomized controlled trial. *Jama* 290:1459–1466.
  18. Quinn KL, Macdonald EM, Gomes T, Mamdani MM, Huang A. 2017. Macrolides , Digoxin Toxicity and the Risk of Sudden Death : A Population-Based Study. *Drug Saf*.
  19. Rao GA, Mann JR, Shoaibi A, Bennett CL, Nahhas G, Sutton SS, Jacob S, Strayer SM. 2014. Azithromycin and levofloxacin use and increased risk of cardiac arrhythmia and death. *Ann Fam Med* 12:121–7.
  20. Stein CM, Ch B. 2004. Oral Erythromycin and the Risk of Sudden Death from Cardiac Causes. *Nejm* 351:11:1089–1096.
  21. Ray WA, Ph D, Murray KT, Hall K, Arbogast PG, Ph D, Stein CM, Ch B. 2012. Azithromycin and the Risk of Cardiovascular Death. *N Engl J Med* 367:772–775.
  22. Root AA, Wong AYS, Ghebremichael-Weldeselassie Y, Smeeth L, Bhaskaran K, Evans SJW, Brauer R, Wong ICK, Navaratnam V, Douglas I. 2016. Evaluation of the risk of cardiovascular events with clarithromycin using both propensity score and self-controlled study designs. *Br J Clin Pharmacol* 512–

- 521.
23. Schembri S, Williamson P a, Short PM, Singanayagam A, Akram A, Taylor J, Singanayagam A, Hill AT, Chalmers JD. 2013. Cardiovascular events after clarithromycin use in lower respiratory tract infections: analysis of two prospective cohort studies. *BMJ* 346:f1235.
  24. Sinisalo J, Mattila K, Valtonen V, Anttonen O, Juvonen J, Melin J, Vuorinen-Markkola H, Nieminen MS. 2002. Effect of 3 months of antimicrobial treatment with clarithromycin in acute non-Q-wave coronary syndrome. *Circulation* 105:1555–1560.
  25. Stone AFM, Mendall MA, Kaski JC, Edger TM, Risley P, Poloniecki J, Camm AJ, Northfield TC. 2002. Effect of treatment for *Chlamydia pneumoniae* and *Helicobacter pylori* on markers of inflammation and cardiac events in patients with acute coronary syndromes: South Thames trial of antibiotics in myocardial infarction and unstable angina (STAMINA). *Circulation* 106:1219–1223.
  26. Straus SMJM, Sturkenboom MCJM, Bleumink GS, Dieleman JP, Van Der Lei J, De Graeff PA, Kingma JH, Stricker BHC. 2005. Non-cardiac QTc-prolonging drugs and the risk of sudden cardiac death. *Eur Heart J* 26:2007–2012.
  27. Svanström H, Pasternak B, Hviid A. 2013. Use of azithromycin and death from cardiovascular causes. *N Engl J Med* 368:1704–12.
  28. Svanström H, Pasternak B, Hviid A. 2014. Use of clarithromycin and roxithromycin and risk of cardiac death: cohort study. *BMJ* 349:g4930.
  29. Trac MH, McArthur E, Jandoc R, Dixon SN, Nash DM, Hackam DG, Garg AX. 2016. Macrolide antibiotics and the risk of ventricular arrhythmia in older adults. *Can Med Assoc J*.
  30. Schink T, Poluzzi E, Frøslev T, Molokhia M, Diemberger I. 2017. Use of azithromycin and risk of ventricular arrhythmia 189:560–568.
  31. Vainas T, Stassen FRM, Schurink GWH, Tordoir JHM. 2005. Secondary Prevention of Atherosclerosis Through *Chlamydia pneumoniae* Eradication (SPACE Trial ): A Randomised Clinical Trial in Patients with Peripheral Arterial Disease 411:403–411.
  32. Wong AYS, Root A, Douglas IJ, Chui CSL, Chan EW, Ghebremichael-Weldeselassie Y, Siu C-W, Smeeth L, Wong ICK. 2016. Cardiovascular outcomes associated with use of clarithromycin: population based study. *BMJ* 352:h6926.

33. Zambon A, Polo Friz H, Contiero P, Corrao G. 2009. Effect of macrolide and fluoroquinolone antibacterials on the risk of ventricular arrhythmia and cardiac arrest: an observational study in Italy using case-control, case-crossover and case-time-control designs. *Drug Saf* 32:159–67.
34. Trac MH, McArthur E, Jandoc R, Dixon SN, Nash DM, Hackam DG, Garg AX. 2016. Macrolide antibiotics and the risk of ventricular arrhythmia in older adults. *CMAJ* 188:E120-9.
